# Supplementary material
Source: PubMed Central journal article supplement (PMC6355091)

**A**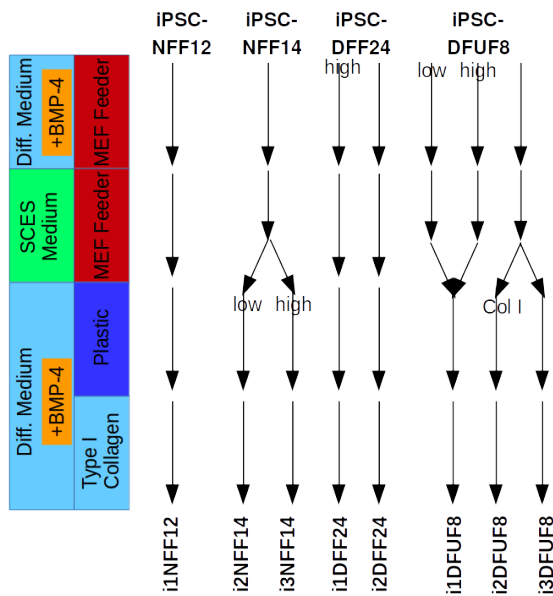**B**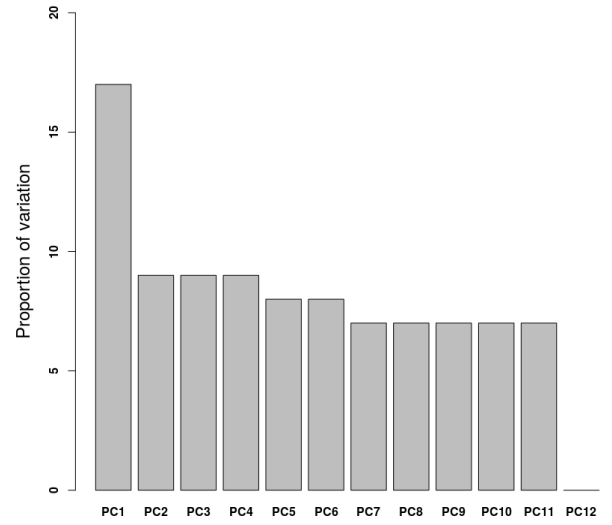**C**

REVIGO Gene Ontology treemap

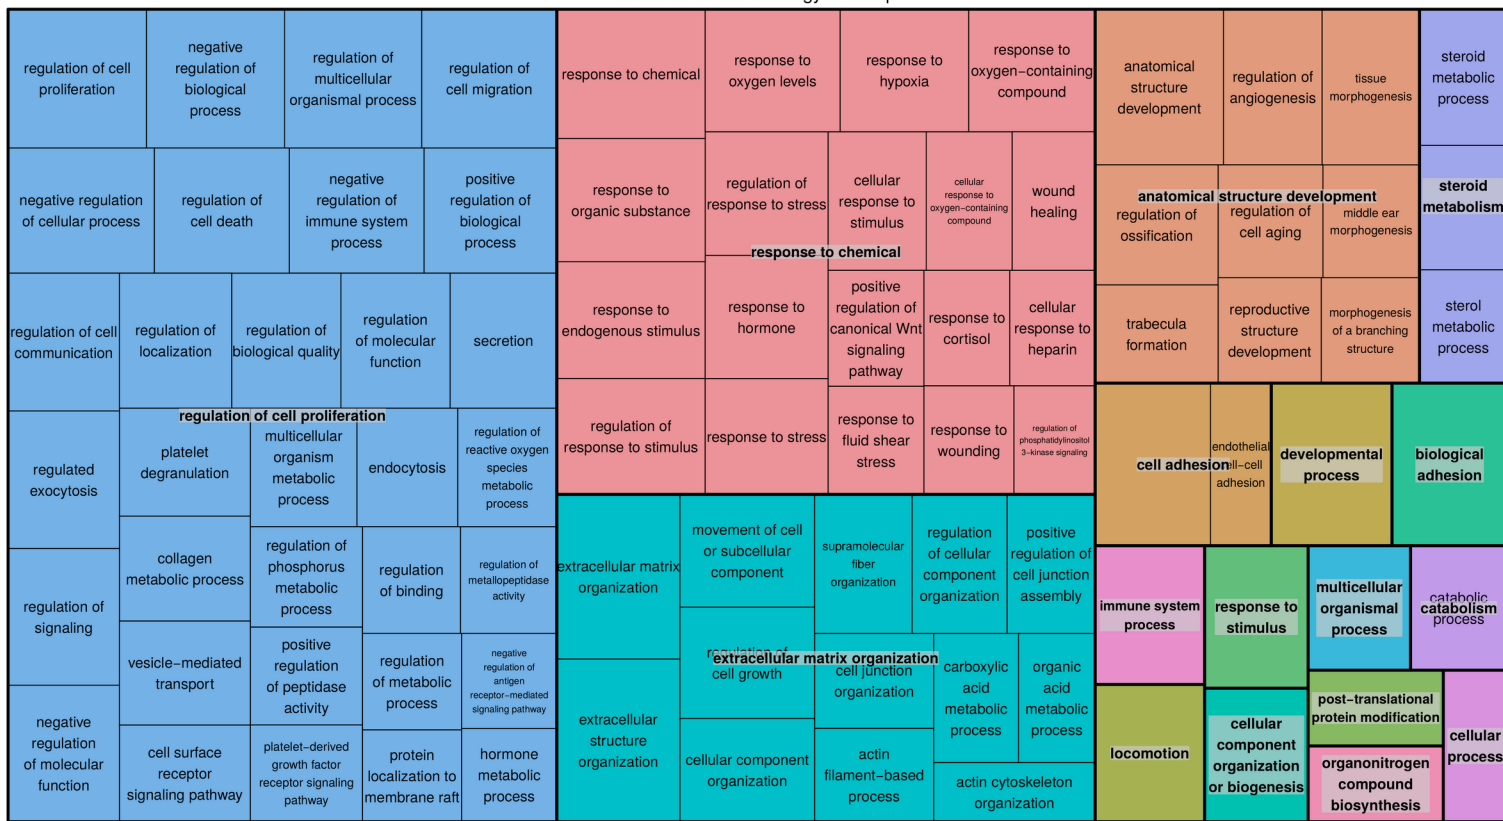**D**

iPSC-derived vs primary DFF&amp;DFUF

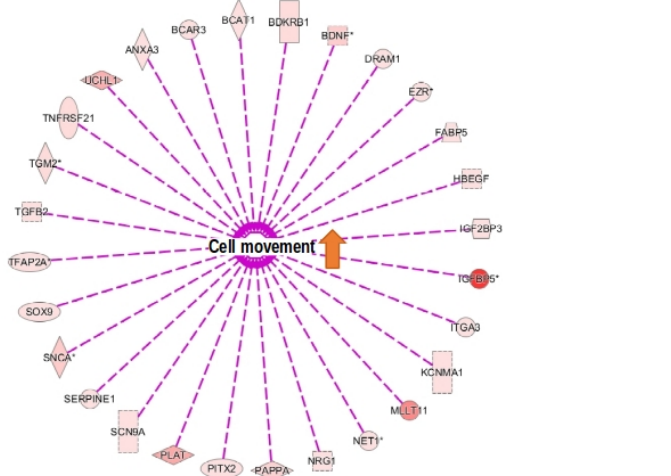**E**

iPSC-derived vs primary DFUF

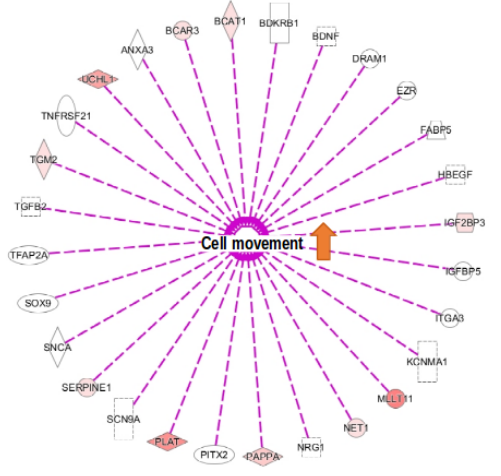

Supplement: fj.201801059.sf1.pdf [file fj.201801059.sf1.pdf]
