# Supplementary material
Source: PubMed Central journal article supplement (PMC6355091)

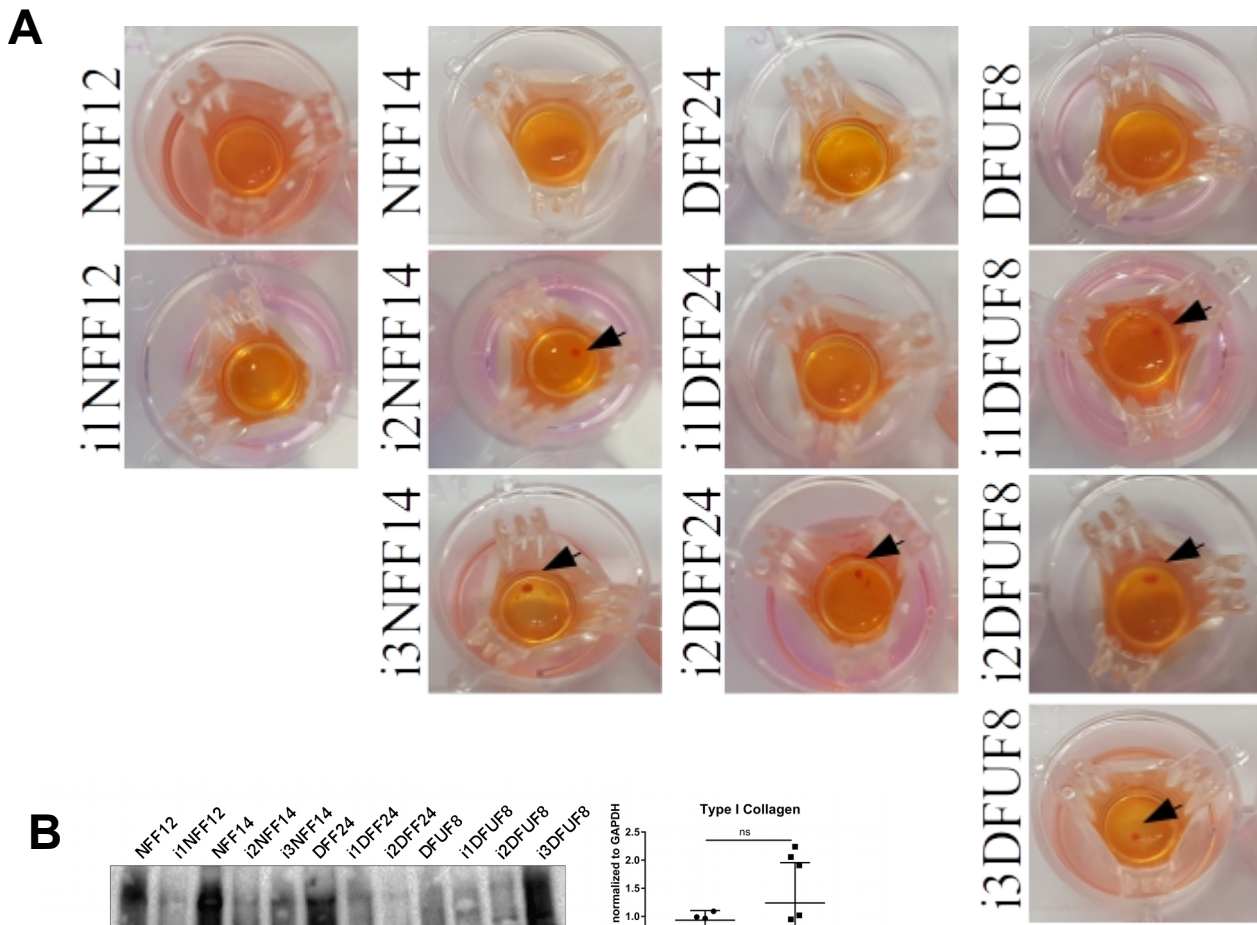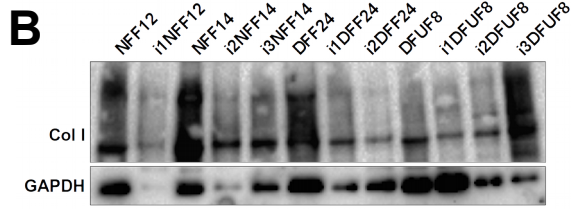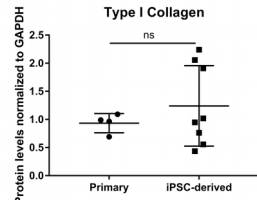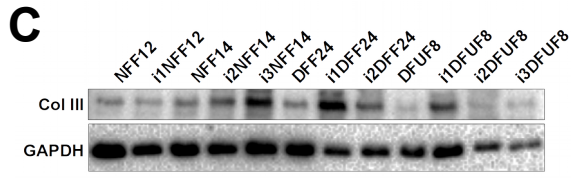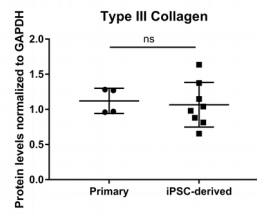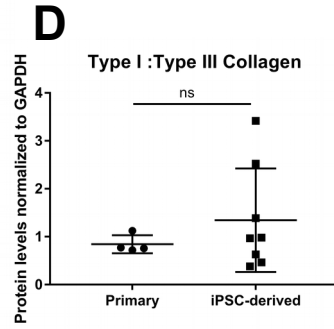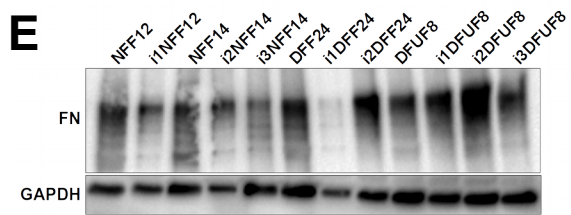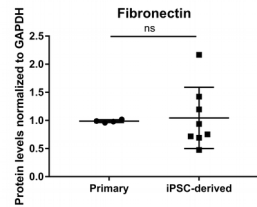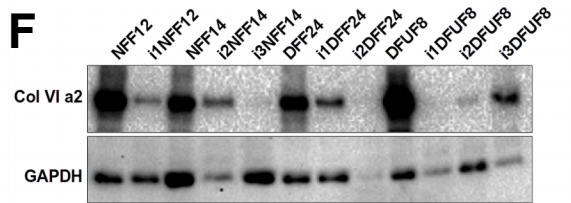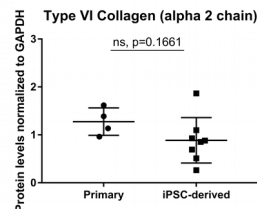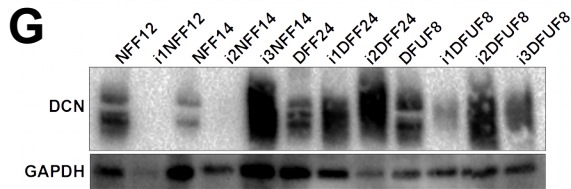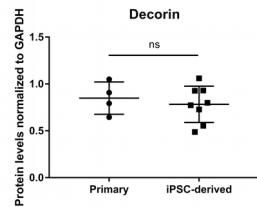

Supplement: fj.201801059.sf2.pdf [file fj.201801059.sf2.pdf]
